# Supplementary material for: A Skin‐Interfaced, Miniaturized Microfluidic Analysis and Delivery System for Colorimetric Measurements of Nutrients in Sweat and Supply of Vitamins Through the Skin
Source: PubMed Central journal article supplement (PMC8805554; doi:10.1002/advs.202103331), 2021-11-07
Supplement: ADVS-9-2103331-s001.pdf [file ADVS-9-2103331-s001.pdf]

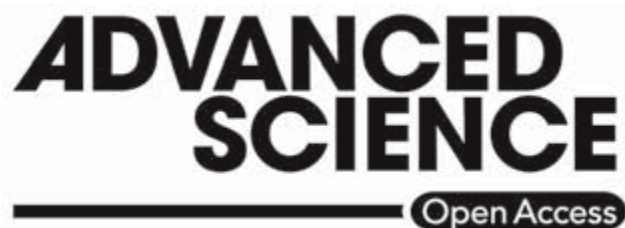

## Supporting Information

for *Adv. Sci.*, DOI: 10.1002/adv.202103331

**A skin-interfaced, miniaturized microfluidic analysis and delivery system for colorimetric measurements of nutrients in sweat and supply of vitamins**

*Joohee Kim, Yixin Wu, Haiwen Luan, Da Som Yang, Donghwi Cho, Sung Soo Kwak, Shanliangzi Liu, Hanjun Ryu, Roozbeh Ghaffari, and John A. Rogers\**

## Supporting Information

A skin-interfaced, miniaturized microfluidic analysis and delivery system for colorimetric measurements of nutrients in sweat and supply of vitamins

*Joohee Kim, Yixin Wu, Haiwen Luan, Da Som Yang, Donghwi Cho, Sung Soo Kwak, Shanliangzi Liu, Hanjun Ryu, Roozbeh Ghaffari, John A. Rogers\**

This section includes the following:

1. Supporting Information Text
2. Figure S1-S11
3. Table S1

**Supporting Information Text****Calculation of bursting pressure of capillary bursting valves (CBVs)**

The bursting pressure was calculated based on Young–Laplace equation.<sup>[32]</sup> The Young–Laplace equation gives the bursting pressure in a rectangular channel as

$$\text{Bursting pressure} = -2\sigma\left[\frac{\cos\theta_I^*}{b} + \frac{\cos\theta_A}{h}\right] \quad (1)$$

where  $\sigma$  is the surface tension of liquid,  $\theta_A$  is the contact angle of the channel,  $\theta_I^*$  is the min  $[\theta_A + \beta; 180^\circ]$ ,  $\beta$  is the diverging angle of the channel,  $b$  and  $h$  are the width and the height of the diverging section, respectively. The CBVs #1, and #2 have diverging angles of  $13^\circ$  and  $90^\circ$ , respectively, and widths of  $300 \mu\text{m}$ . The heights of the valves are  $1,000 \mu\text{m}$ . PDMS, which is naturally hydrophobic, becomes hydrophilic after exposure to oxygen plasma for the purpose of activating the surfaces to enable bonding. The hydrophobicity recovers after  $\approx 24 \text{ h}$ , to reach a constant, time-independent contact angle of  $107^\circ$ .<sup>[32]</sup> Based on this parameter, the calculated bursting pressures for CBVs #1, and #2 are  $0.29 \text{ kPa}$ , and  $0.52 \text{ kPa}$ , respectively.”

## Figures and Table

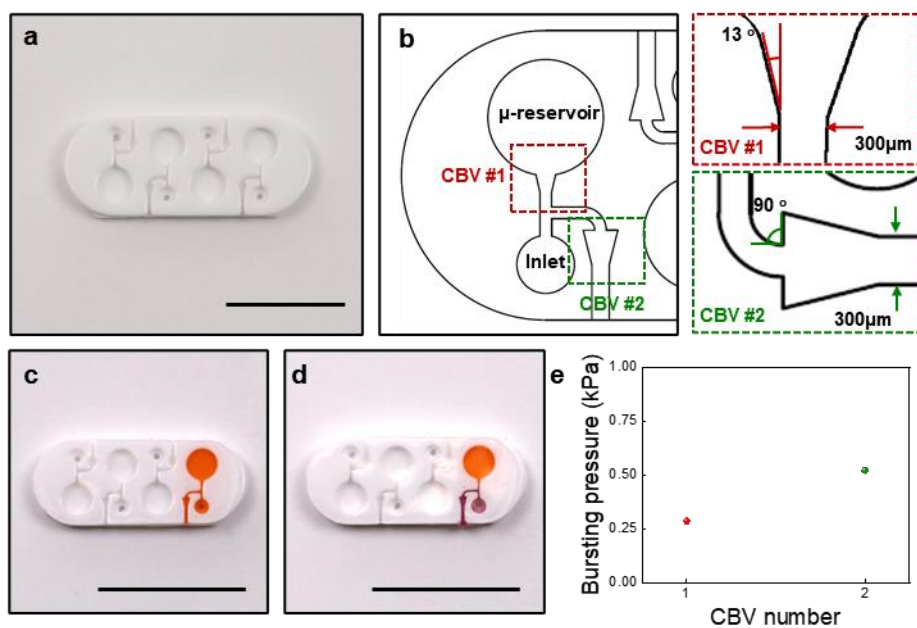

**Figure S1. Capillary bursting valves (CBVs) designs for sequential sampling of sweat. a,** Optical image of the CBVs. Scale bar, 1 cm. **b,** Detailed schematic illustration of sampling inlet,  $\mu$ -reservoir, and the CBVs with different channel widths and diverging angles. Optical images of the mechanisms by which the action of the CBVs lead to filling **c,**  $\mu$ -reservoir, **d,** microfluidic channel. Scale bars: 1 cm. **e,** Calculated bursting pressures of each capillary bursting valve.

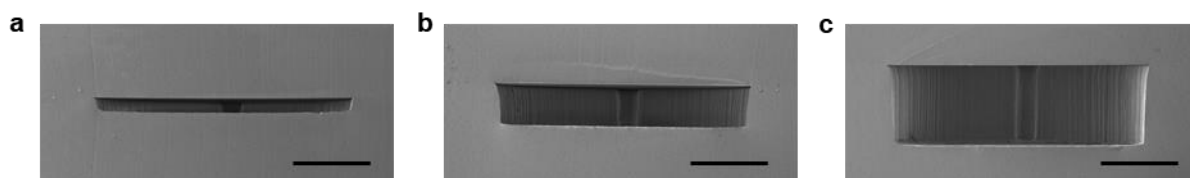

**Figure S2.** Cross-sectional scanning electron microscopy (SEM) images of microfluidic reservoirs at thicknesses of **a**, 200  $\mu\text{m}$ , **b**, 500  $\mu\text{m}$ , **c**, 1,000  $\mu\text{m}$ . Scale bars: 1 mm.

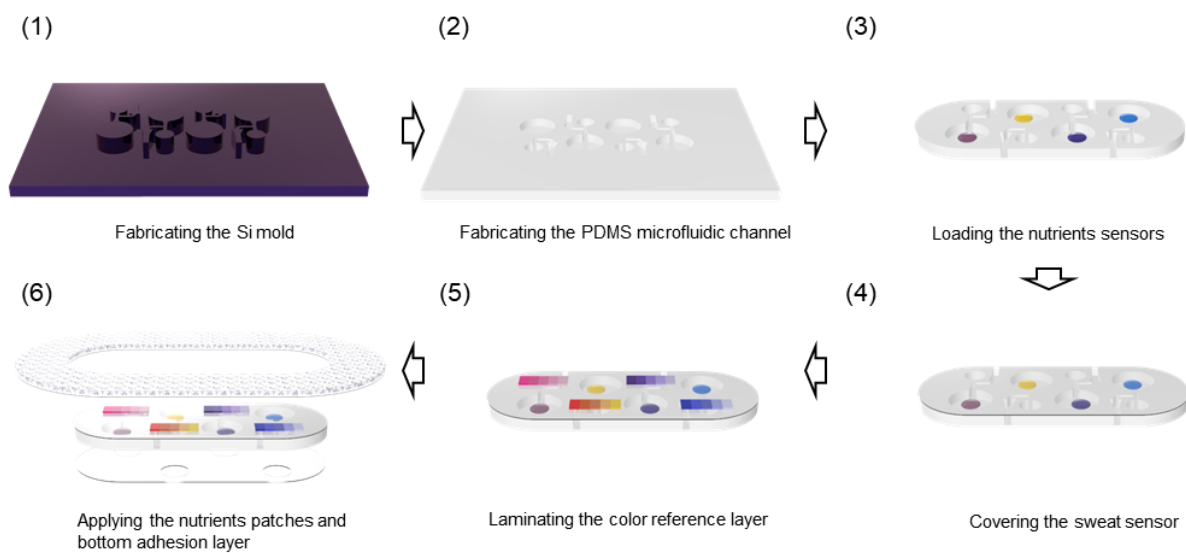

**Figure S3.** Schematic illustration of the fabrication procedures for the epidermal microfluidic device.

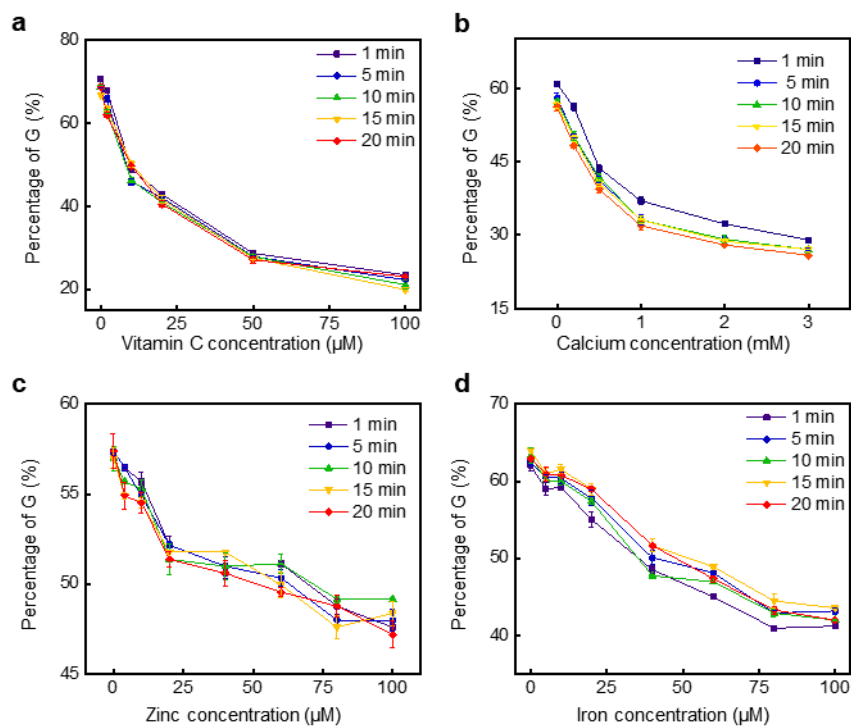

**Figure S4.** The normalized percentage of the green level captured at various times as a function of concentrations of **a**, vitamin C, **b**, calcium, **c**, zinc, and **d**, iron.

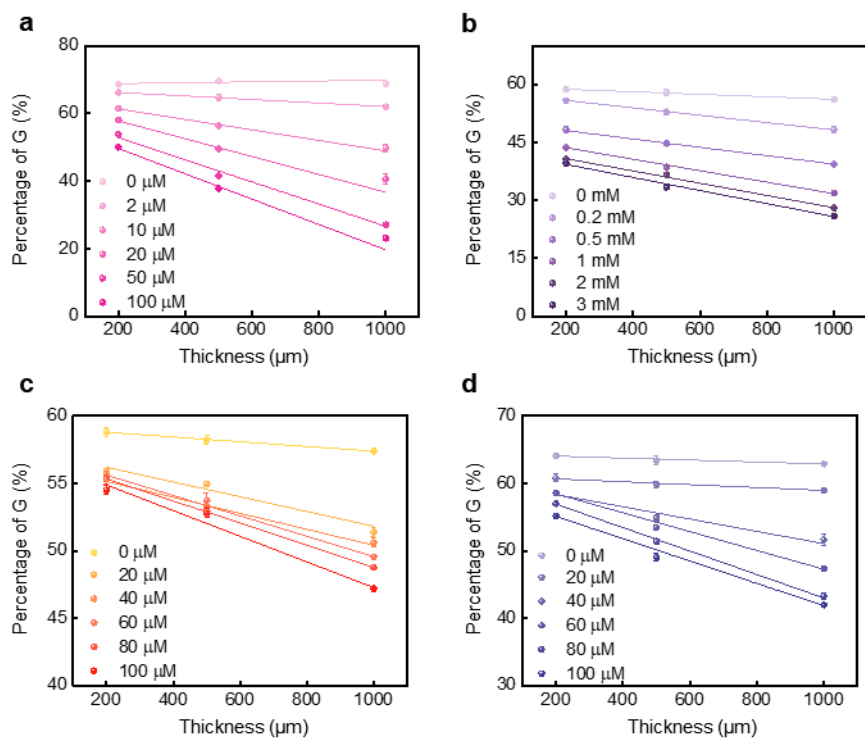

**Figure S5.** Normalized percentage of the green level as a function of thickness at various concentrations of **a**, vitamin C, **b**, calcium, **c**, zinc, and **d**, iron.



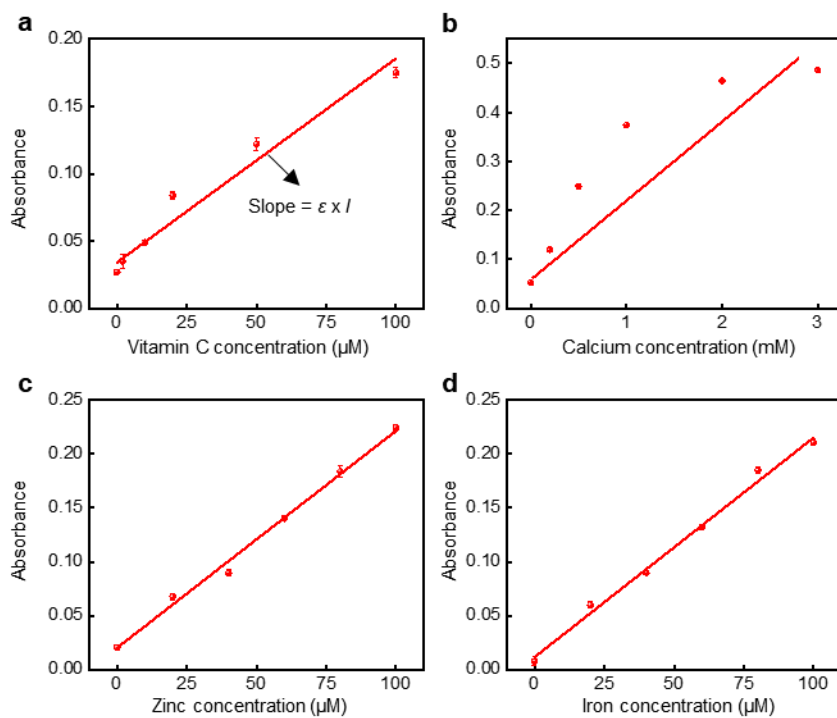

**Figure S6.** Calibration curve that relates the absorbance to the concentration for **a**, vitamin C, **b**, calcium, **c**, zinc, and **d**, iron.

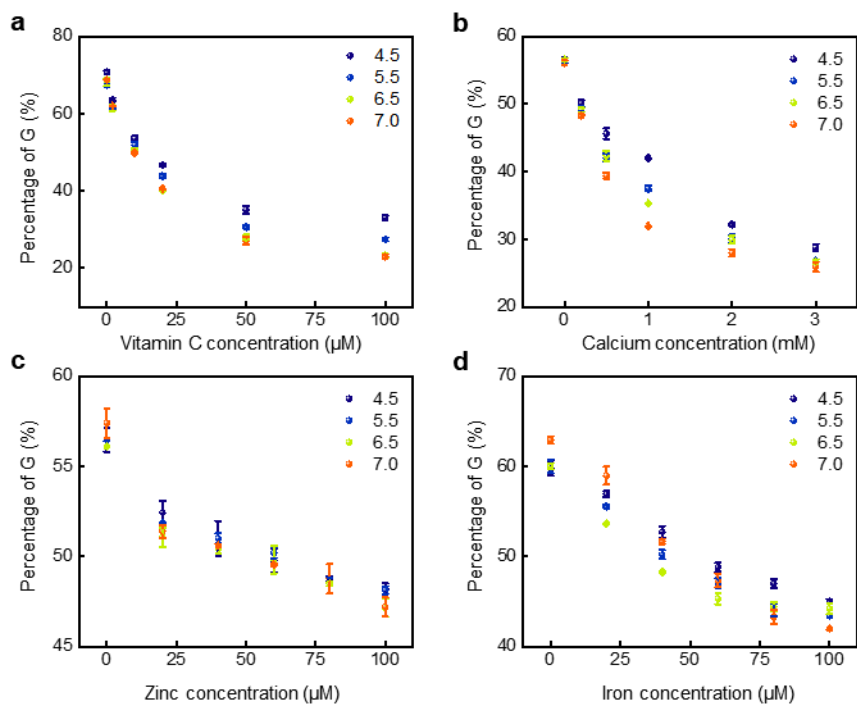

**Figure S7.** Normalized percentage of the green level at various pH as a function of concentration of **a**, vitamin C, **b**, calcium, **c**, zinc, and **d**, iron.

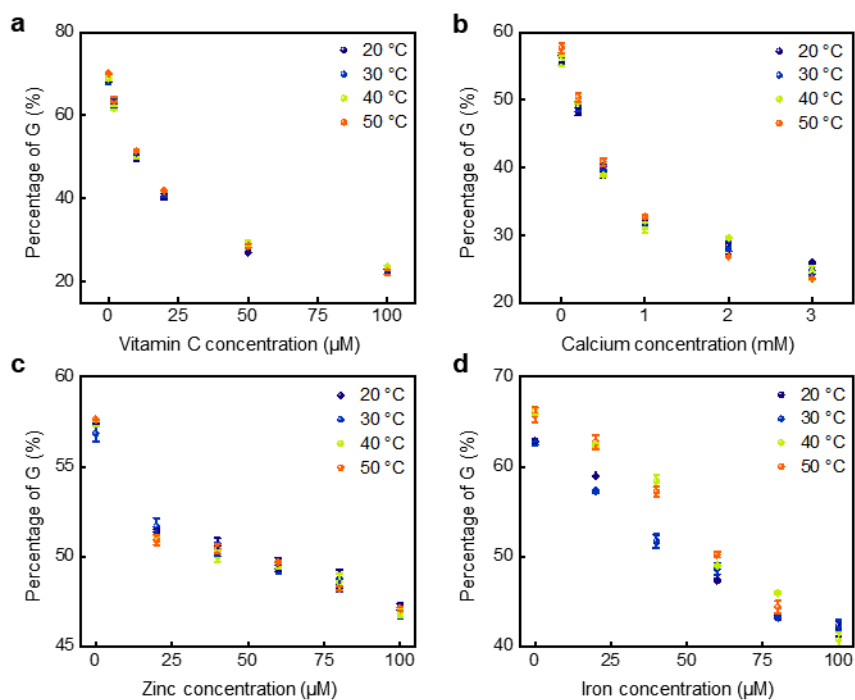

**Figure S8.** The normalized percentage of the green level at various temperatures as a function of concentration of **a**, vitamin C, **b**, calcium, **c**, zinc, and **d**, iron.

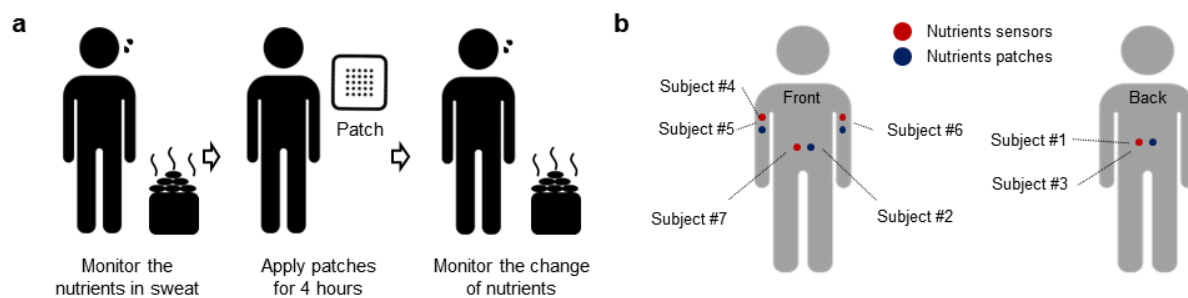

**Figure S9.** **a**, Schematic illustration of the nutrients sensor experiment before and after applying the vitamin patch for 4 hours. **b**, Illustration of the mounting locations of the sweat patches.

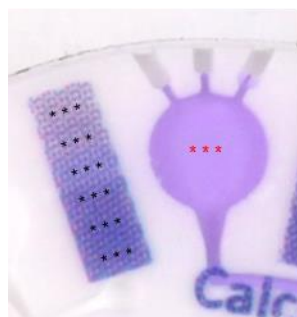

| Concentration (mM) | Percentage of G value (%) |
|--------------------|---------------------------|
| 0                  | 66.79                     |
| 0.2                | 60.65                     |
| 0.5                | 54.50                     |
| 1                  | 43.13                     |
| 2                  | 38.43                     |
| 3                  | 36.86                     |
| Reservoir          | 61.31                     |

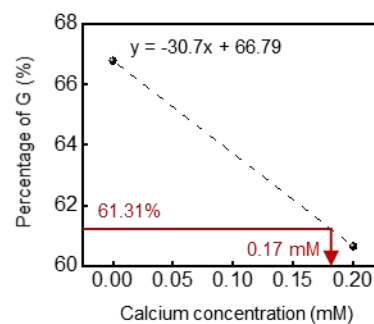

**Figure S10.** Interpolation method to analyze the concentration from the normalized color value of sweat filled reservoirs using prepared color reference markers.

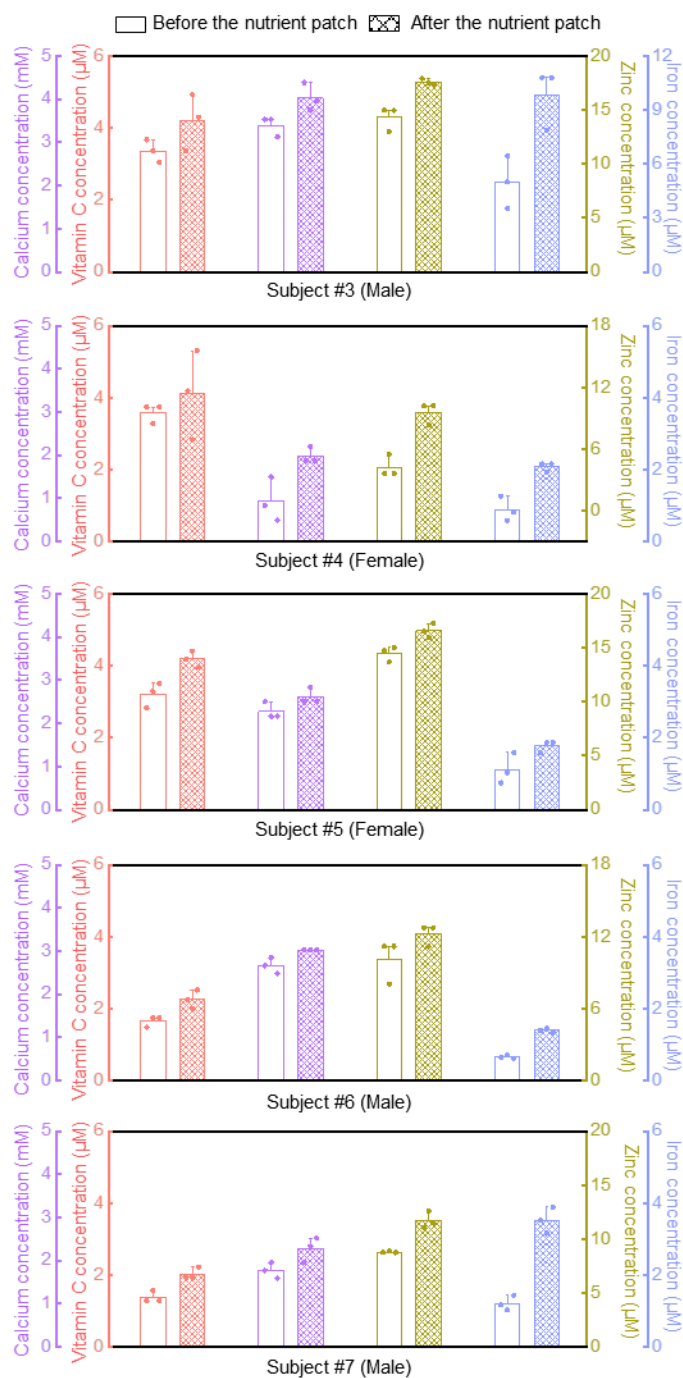

**Figure S11.** Graphs of the concentrations of nutrients in sweat before and after applying a nutrients patch for 4 hours from subject #3-#7.

|                      | <b>Vitamin C<br/>(mg)</b> | <b>Calcium (mg)</b> | <b>Zinc (mg)</b> | <b>Iron (mg)</b> |
|----------------------|---------------------------|---------------------|------------------|------------------|
| <b>Vitamin water</b> | 135                       | 80                  | 0                | 0                |
| <b>Orange juice</b>  | 63                        | 20                  | 0                | 0                |
| <b>Cereal</b>        | 7.2                       | 80                  | 1.65             | 10.8             |

**Table S1.** The nutrients content in vitamin water, orange juice, and cereal.
